# Supplementary material
Source: publisher site journal article supplement (https://www.dovepress.com/article/321949)
Supplement: Supplementary file 1 [file get_supplementary_file.php]

**Supplementary materials**


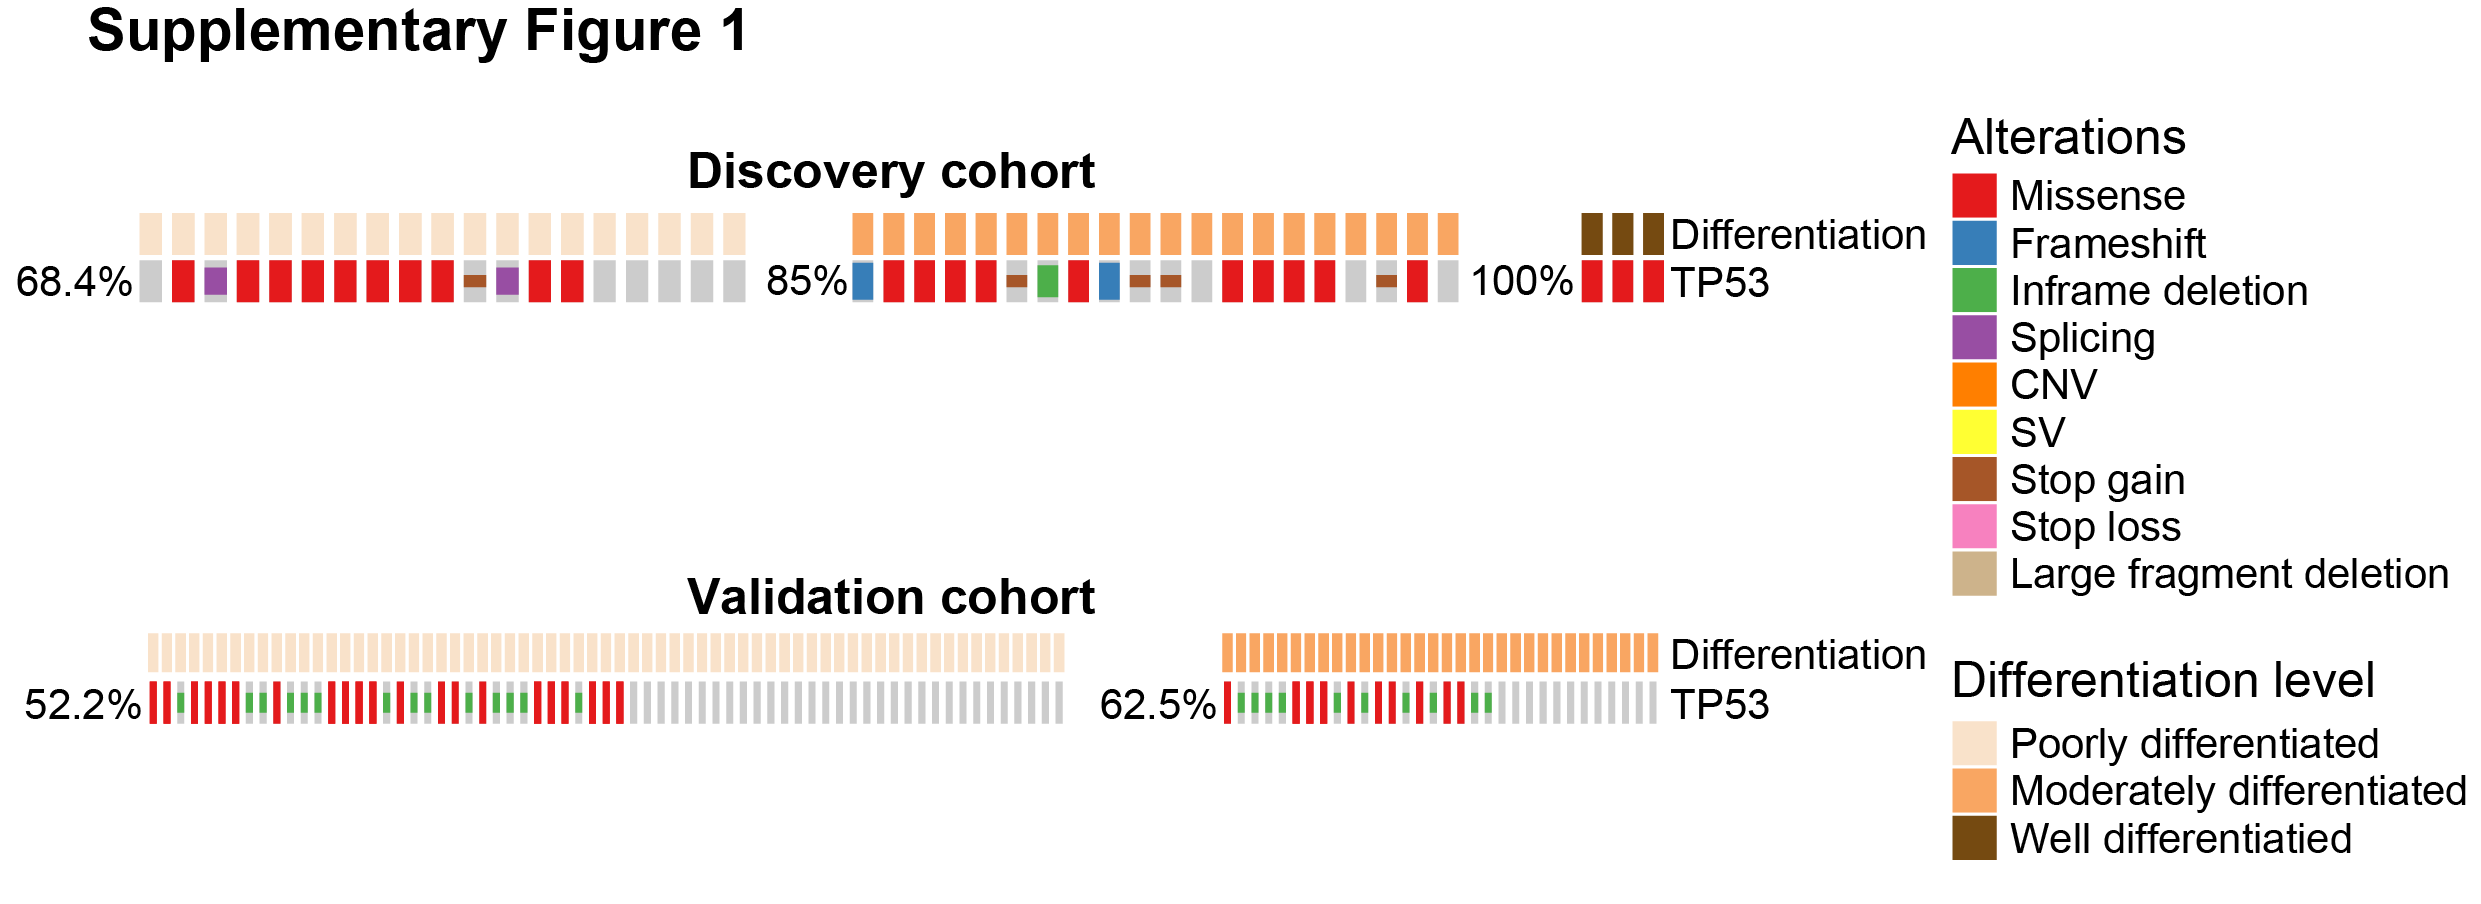
**Supplementary Figure 1** *TP53* mutation frequency was associated with differentiation level in gastric cancer. Co-mutation plot of *TP53* mutations with various differentiation levels in the discovery patient cohort (upper panel) or the validation patient cohort (lower panel). CNV, copy number variation; SV, structural variant.


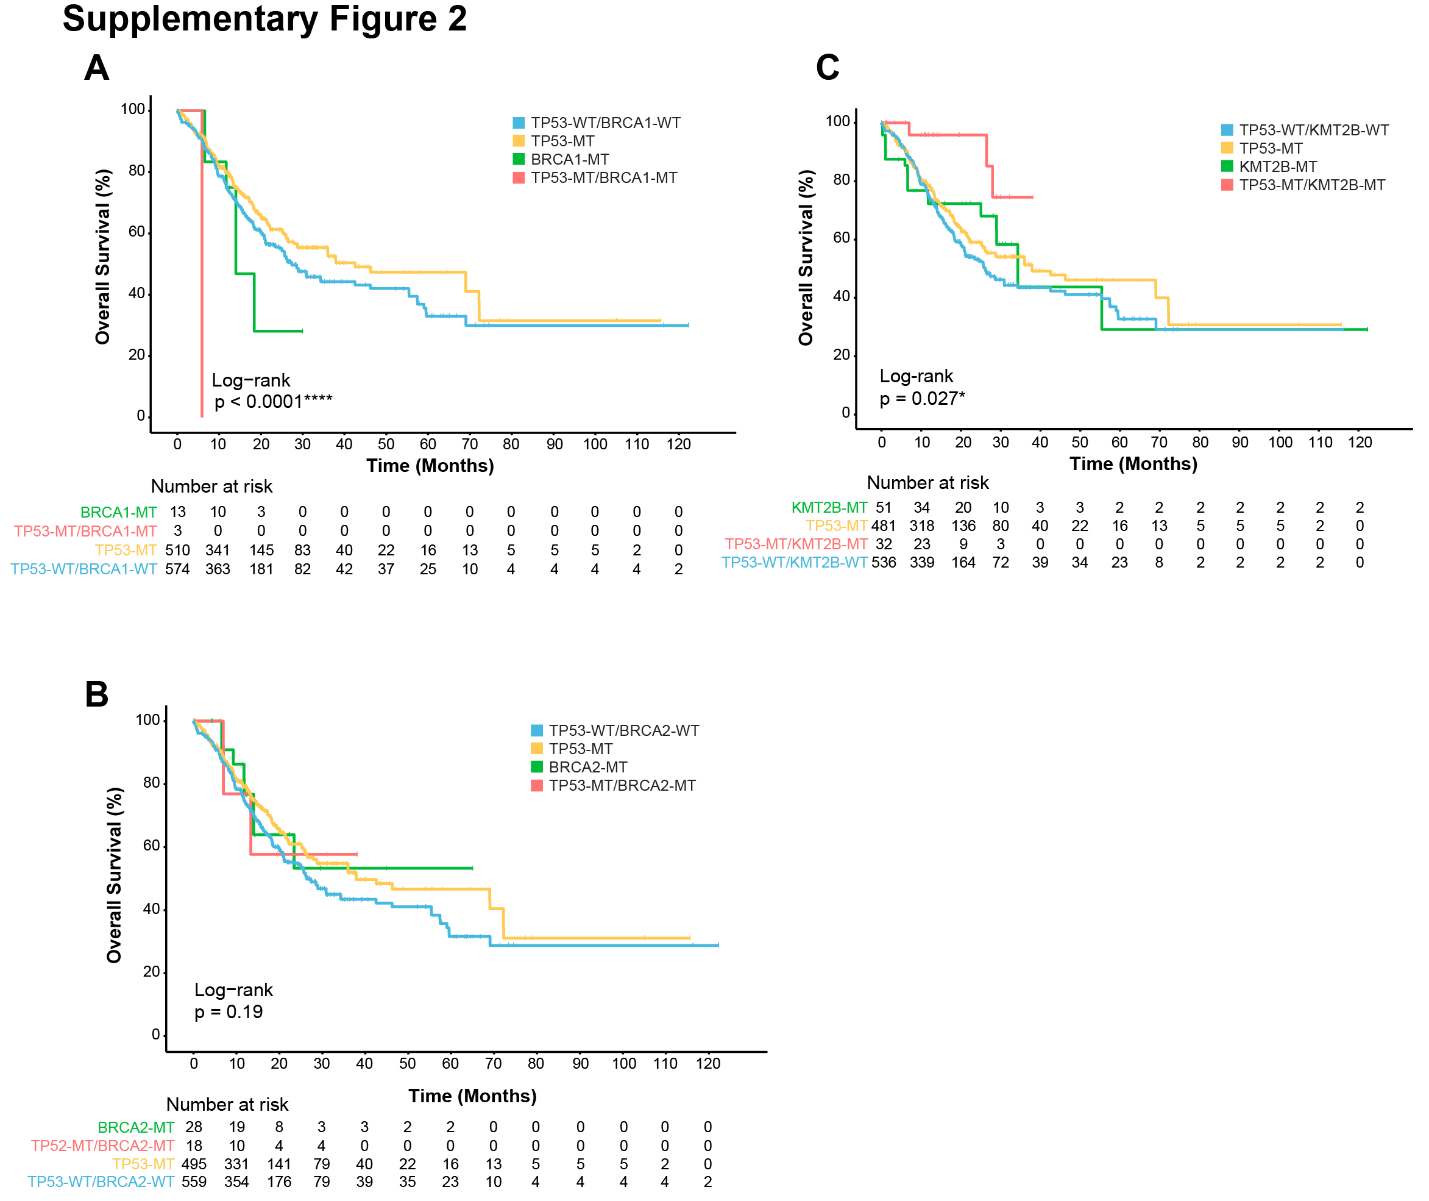


**Supplementary Figure 2** Patient survival with different co-mutational status.Kaplan-Meier curve of overall survival (OS) of patients from the validation patient cohort in strata of different *TP53* and *BRCA1* mutation status (**A**), *TP53* and *BRCA2* mutation status (**B**), and different *TP53* and *KMT2B* mutation status (**C**). The log-rank test was used for analyzing the survival data. WT: wild type; MT: mutant. Two-sided p values of less than 0.05 was considered as statistically significant (*p<0.05, **p<0.01, ***p<0.001, ****p<0.0001).


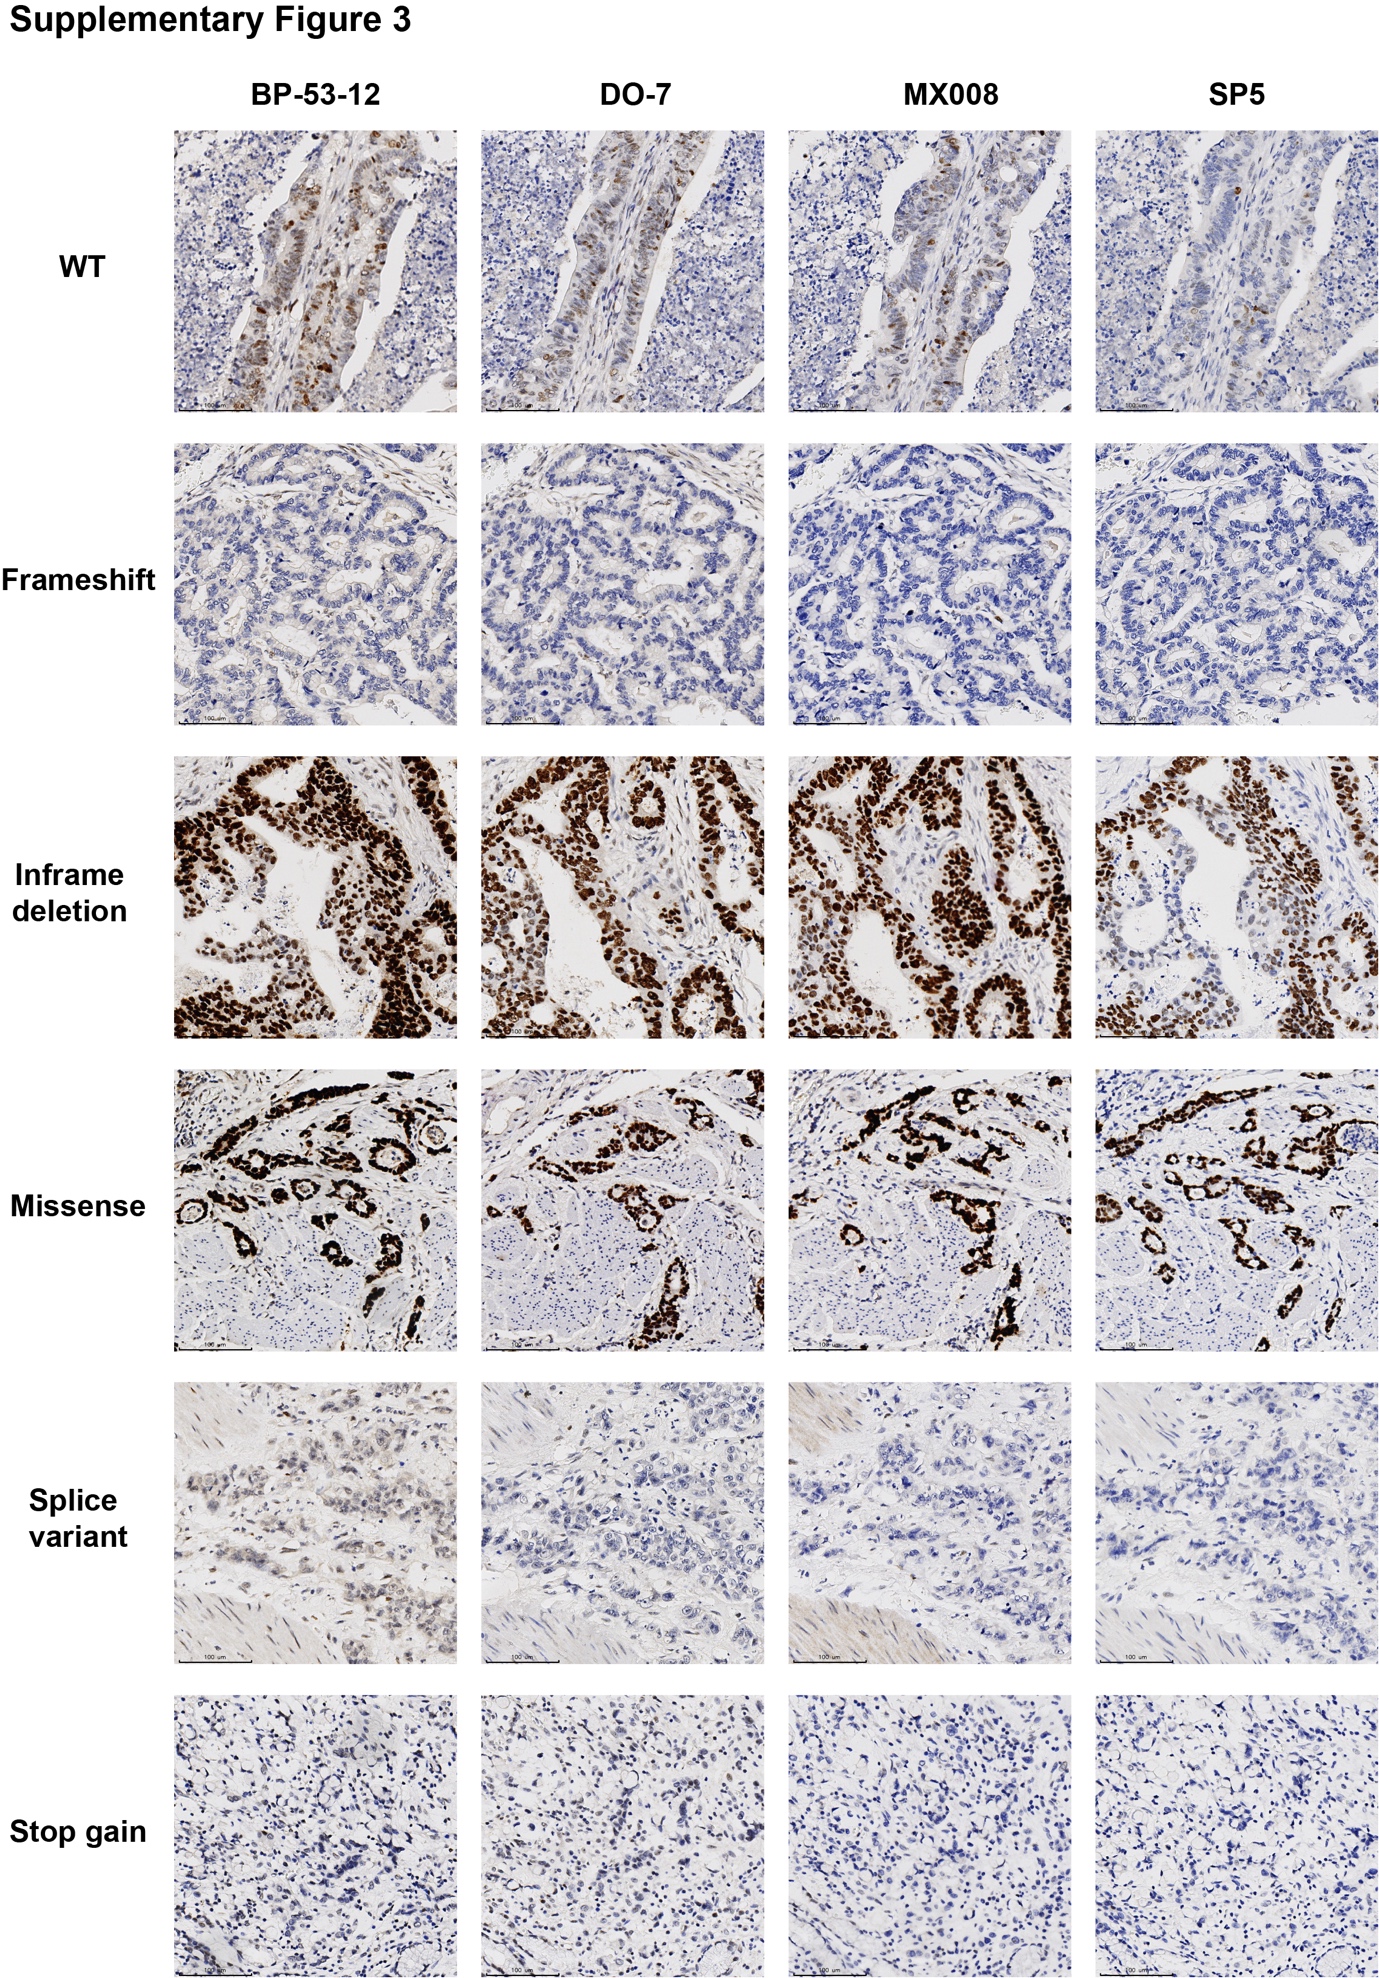


**Supplementary Figure 3** Representative IHC images of each *TP53* mutational type, including *TP53* WT, *TP53* frameshift mutation, *TP53* inframe deletion, *TP53* messense mutation, *TP53* splice variant, and *TP53* stop gain mutation. The IHC images of each *TP53* mutational were generated from similar sections of the same tumor specimen. WT: wild type.

**Supplementary Table 1** The demographic characteristics of 1,313 gastric cancer patients in the validation cohort. EBV, Epstein-Barr virus; MSI, microsatellite instability; GS, genomically stable; CIN, chromosomal instability; MSS, microsatellite stable; NA, not available.

|  | **No. of patient** | **Percentage (%)** |
| --- | --- | --- |
| **Median age, years (range)** | 67 (30-90) |  |
|  |  |  |
| **Gender** |  |  |
| Male | 812 | 61.8 |
| Female | 466 | 35.5 |
| NA | 35 | 2.7 |
|  |  |  |
| **Tumor differentiation level** |  |  |
| Poorly differentiated | 67 | 5.1 |
| Moderate to well differentiated | 33 | 2.5 |
| NA | 1213 | 92.4 |
|  |  |  |
| **Microsatellite status** |  |  |
| MSI | 74 | 5.6 |
| MSS | 321 | 24.4 |
| NA | 918 | 69.9 |
|  |  |  |
| **Stage** |  |  |
| Tis | 1 | 0.1 |
| I | 8 | 0.6 |
| II | 20 | 1.5 |
| III | 41 | 3.1 |
| IV | 30 | 2.3 |
| NA | 1213 | 92.4 |
|  |  |  |
| **Subtypes** |  |  |
| EBV-positive | 30 | 2.3 |
| MSI | 72 | 5.5 |
| CIN | 220 | 16.8 |
| GS | 49 | 3.7 |
| NA | 942 | 71.7 |

**Supplementary Table 2** Detailed mutated genes in 42-patient cohort. Amp, amplification.

| Patient ID | Gene | Amino acid change | Mutation type |
| --- | --- | --- | --- |
| P1 | TP53 | c.742C>T(p.R248W) | missense_variant |
| P1 | MAP2K4 | c.938T>G(p.V313G) | missense_variant |
| P1 | FGF19 | . | Amp |
| P1 | CCND1 | . | Amp |
| P2 | FBXW7 | c.1310G>A(p.G437E) | missense_variant |
| P2 | ERBB2 | c.2033G>A(p.R678Q) | missense_variant |
| P2 | FLT4 | c.508C>T(p.R170C) | missense_variant |
| P3 | GATA1 | c.889A>G(p.M297V) | missense_variant |
| P3 | RNF43 | c.575delC(p.P192Rfs*11) | frameshift_variant |
| P3 | KMT2B | c.3769C>T(p.R1257C) | missense_variant |
| P3 | RNF43 | c.1111C>T(p.R371*) | stop_gained |
| P3 | EPHA2 | c.2698G>A(p.G900S) | missense_variant |
| P3 | TNFRSF11A | c.1679C>T(p.A560V) | missense_variant |
| P3 | TGFBR2 | c.1582C>T(p.R528C) | missense_variant |
| P3 | SETBP1 | c.154G>A(p.G52R) | missense_variant |
| P3 | SMARCA4 | c.4801C>T(p.R1601W) | missense_variant |
| P3 | LRP1B | c.67G>A(p.V23M) | missense_variant |
| P3 | SMARCA4 | c.3634_3636delGAG(p.E1212del) | inframe_deletion |
| P3 | IDH2 | c.435delG(p.T146Lfs*15) | frameshift_variant |
| P3 | STK11 | c.996G>A(p.W332*) | stop_gained |
| P3 | SLC3A2 | c.899delA(p.K300Rfs*31) | frameshift_variant |
| P3 | CHEK1 | c.1136G>A(p.R379Q) | missense_variant |
| P3 | RARA | c.1319delC(p.P440Rfs*203) | frameshift_variant |
| P3 | BAX | c.121delG(p.E41Rfs*19) | frameshift_variant |
| P3 | FGFR3 | c.1206dupC(p.K403Qfs*93) | frameshift_variant |
| P3 | GATA4 | c.1027G>A(p.A343T) | missense_variant |
| P3 | TTF1 | c.821delA(p.K274Sfs*149) | frameshift_variant |
| P3 | LRP1B | c.10295-2A>G | splice_acceptor_variant |
| P3 | FANCA | c.1844C>A(p.P615Q) | missense_variant |
| P3 | DPYD | c.1376G>A(p.W459*) | stop_gained |
| P3 | CDK4 | c.308A>G(p.Y103C) | missense_variant |
| P3 | NSD1 | c.5397delT(p.F1799Lfs*22) | frameshift_variant |
| P3 | PIK3CA | c.3061T>C(p.Y1021H) | missense_variant |
| P3 | PIK3CA | c.1589A>G(p.Q530R) | missense_variant |
| P3 | ARID1B | c.5296A>G(p.T1766A) | missense_variant |
| P3 | NBN | c.1396dupA(p.R466Kfs*5) | frameshift_variant;splice_region_variant |
| P3 | ETV6 | c.1140G>T(p.W380C) | missense_variant |
| P3 | WISP3 | c.678delA(p.K226Nfs*24) | frameshift_variant |
| P3 | ZNF217 | c.724delA(p.T242Lfs*30) | frameshift_variant |
| P3 | THADA | c.1639_1642delGATT(p.D547Ifs*7) | frameshift_variant |
| P3 | TOP1 | c.1384C>T(p.R462*) | stop_gained |
| P3 | PKHD1 | c.10118A>T(p.K3373I) | missense_variant |
| P3 | NSD1 | c.6502G>A(p.G2168R) | missense_variant |
| P3 | TTF1 | c.2538dupA(p.G847Rfs*3) | frameshift_variant |
| P3 | ETV1 | c.428C>T(p.T143M) | missense_variant |
| P3 | NAT1 | c.806dupA(p.N269Kfs*4) | frameshift_variant |
| P3 | ERBB2IP | c.1781T>G(p.V594G) | missense_variant |
| P3 | NOTCH1 | c.7455delC(p.S2486Rfs*103) | frameshift_variant |
| P3 | CTCF | c.637C>T(p.R213C) | missense_variant |
| P3 | NTRK3 | c.994A>C(p.T332P) | missense_variant |
| P3 | MAP3K4 | c.479delA(p.N160Mfs*8) | frameshift_variant |
| P3 | BRD4 | c.3479C>A(p.P1160H) | missense_variant |
| P3 | LHCGR | c.774delA(p.K258Nfs*16) | frameshift_variant |
| P3 | ATR | c.2320dupA(p.I774Nfs*3) | frameshift_variant |
| P3 | FOXP1 | c.1537G>A(p.V513M) | missense_variant |
| P3 | MSH6 | c.3261dupC(p.F1088Lfs*5) | frameshift_variant |
| P3 | NOTCH1 | c.4670A>G(p.D1557G) | missense_variant |
| P3 | DPYD | c.2530G>A(p.E844K) | missense_variant |
| P3 | PRKCI | c.826dupA(p.T276Nfs*16) | frameshift_variant |
| P3 | FAT1 | c.11856delT(p.F3952Lfs*31) | frameshift_variant |
| P3 | JAK1 | c.2580delA(p.K860Nfs*16) | frameshift_variant |
| P3 | PREX2 | c.4589G>T(p.S1530I) | missense_variant |
| P3 | HNF1A | c.1136delC(p.P379Lfs*5) | frameshift_variant |
| P3 | NTRK3 | c.1184T>C(p.F395S) | missense_variant |
| P3 | KMT2B | c.5726C>T(p.P1909L) | missense_variant |
| P3 | FANCA | c.346A>G(p.M116V) | missense_variant |
| P3 | BRCA2 | c.3134T>C(p.V1045A) | missense_variant |
| P3 | RAF1 | c.1852C>T(p.R618W) | missense_variant |
| P3 | CDKN2A | c.225dupC(p.A76Rfs*44) | frameshift_variant |
| P3 | KRAS | c.175G>A(p.A59T) | missense_variant |
| P3 | SETD2 | c.4757A>G(p.H1586R) | missense_variant |
| P3 | SGK1 | c.1231G>A(p.V411I) | missense_variant |
| P3 | NSD1 | c.1493G>A(p.R498Q) | missense_variant |
| P3 | NF1 | c.3916C>T(p.R1306*) | stop_gained |
| P3 | ALK | c.1833G>T(p.M611I) | missense_variant |
| P3 | EXT1 | c.1237G>A(p.E413K) | missense_variant |
| P3 | BRCA2 | c.7806-2A>G | splice_acceptor_variant |
| P3 | LRP1B | c.8606T>C(p.F2869S) | missense_variant |
| P3 | MYC | . | Amp |
| P4 | RUNX1 | c.313C>G(p.H105D) | missense_variant |
| P4 | NTRK3 | c.1788C>G(p.I596M) | missense_variant |
| P4 | BRCA2 | c.6170G>A(p.G2057E) | missense_variant |
| P4 | LRP1B | c.313G>T(p.D105Y) | missense_variant |
| P4 | PTPN13 | c.7424G>A(p.R2475H) | missense_variant |
| P4 | FGF19 | . | Amp |
| P4 | CCND1 | . | Amp |
| P5 | ARID1A | c.1080_1081dupGC(p.P361Rfs*3) | frameshift_variant |
| P5 | RHOA | c.50G>A(p.G17E) | missense_variant |
| P5 | TP63 | c.1094C>T(p.S365L) | missense_variant |
| P5 | TP53 | c.377A>G(p.Y126C) | missense_variant;splice_region_variant |
| P5 | TP53 | c.742C>T(p.R248W) | missense_variant |
| P5 | KRAS | c.35G>A(p.G12D) | missense_variant |
| P5 | PTCH1 | c.3338G>A(p.R1113H) | missense_variant |
| P5 | MUTYH | c.253C>T(p.H85Y) | missense_variant |
| P6 | GNAS | c.626A>G(p.K209R) | missense_variant |
| P6 | FGF19 | c.379C>T(p.R127C) | missense_variant |
| P6 | BRCA2 | c.4540G>A(p.E1514K) | missense_variant |
| P6 | PDE11A | c.1484C>T(p.P495L) | missense_variant |
| P6 | MCL1 | . | Amp |
| P6 | MYC | . | Amp |
| P7 | PARP2 | c.247G>A(p.V83M) | missense_variant |
| P7 | LRP1B | c.4490A>G(p.K1497R) | missense_variant |
| P7 | LRP1B | c.2555G>T(p.C852F) | missense_variant |
| P7 | TP53 | c.734G>A(p.G245D) | missense_variant |
| P7 | ERBB2 | . | Amp |
| P8 | CDKN1A | c.302T>C(p.L101P) | missense_variant |
| P8 | SMAD3 | c.277C>T(p.R93*) | stop_gained |
| P8 | TP53 | c.747G>C(p.R249S) | missense_variant |
| P9 | SMARCA4 | c.719C>T(p.P240L) | missense_variant |
| P9 | FLT4 | c.3121C>T(p.R1041W) | missense_variant |
| P9 | ESR1 | c.260C>T(p.A87V) | missense_variant |
| P9 | ERBB2 | c.2264T>C(p.L755S) | missense_variant |
| P9 | PLK1 | c.410C>T(p.S137F) | missense_variant;splice_region_variant |
| P9 | ERBB3 | c.785C>A(p.P262H) | missense_variant |
| P9 | KMT2B | c.4235delG(p.G1412Afs*10) | frameshift_variant |
| P9 | KDM5A | c.3597delA(p.G1200Dfs*9) | frameshift_variant |
| P9 | IRF2 | c.500delA(p.N167Mfs*7) | frameshift_variant |
| P9 | ARID1A | c.6384G>T(p.Q2128H) | missense_variant |
| P9 | NKX2-1 | c.236C>T(p.S79L) | missense_variant |
| P9 | PGR | c.373G>A(p.G125R) | missense_variant |
| P9 | POLE | c.2091delC(p.L698Cfs*94) | frameshift_variant |
| P9 | ARID1A | c.5548delG(p.D1850Tfs*33) | frameshift_variant |
| P9 | EWSR1 | c.1426G>T(p.G476C) | missense_variant |
| P9 | CHEK1 | c.676dupA(p.T226Nfs*19) | frameshift_variant |
| P9 | FBXW7 | c.1877C>T(p.A626V) | missense_variant |
| P9 | KMT2B | c.521dupC(p.T176Dfs*8) | frameshift_variant |
| P9 | RNF43 | c.1976delG(p.G659Vfs*41) | frameshift_variant |
| P9 | PGR | c.40G>A(p.V14M) | missense_variant |
| P9 | MTOR | c.1856G>A(p.R619H) | missense_variant |
| P9 | RECQL4 | c.1759G>A(p.A587T) | missense_variant |
| P9 | CASP8 | c.1279_1280delGT(p.V427Ffs*28) | frameshift_variant |
| P9 | XRCC1 | c.1183C>T(p.R395W) | missense_variant |
| P9 | CHD4 | c.5737T>C(p.*1913Rext*41) | stop_lost |
| P9 | CDKN2B | c.265C>T(p.R89W) | missense_variant |
| P9 | ERBB3 | c.383G>A(p.S128N) | missense_variant |
| P9 | KMT2B | c.6764C>T(p.P2255L) | missense_variant |
| P9 | FANCL | c.783A>C(p.K261N) | missense_variant |
| P9 | SUFU | c.893G>A(p.R298Q) | missense_variant |
| P9 | BRD4 | c.1039A>C(p.S347R) | missense_variant |
| P9 | PIK3R1 | c.1559A>C(p.E520A) | missense_variant |
| P9 | NSD1 | c.430_431delAA(p.K144Dfs*10) | frameshift_variant |
| P9 | MCL1 | . | Amp |
| P10 | TP53 | c.776A>T(p.D259V) | missense_variant |
| P10 | TERT | c.1657G>A(p.V553I) | missense_variant |
| P10 | AXL | c.308+2_308+8dupTGTGTGG | frameshift_variant;splice_region_variant |
| P10 | GATA4 | c.797G>A(p.R266Q) | missense_variant |
| P11 | TP53 | c.488A>G(p.Y163C) | missense_variant |
| P11 | NOTCH2 | c.5764G>A(p.A1922T) | missense_variant |
| P11 | STAT3 | c.1654-76_1663del | splice_acceptor_variant;coding_sequence_variant;intron_variant |
| P11 | IGF1R | . | Amp |
| P12 | TP53 | c.637C>T(p.R213*) | stop_gained |
| P12 | PRSS1 | c.662C>G(p.A221G) | missense_variant |
| P13 | TP53 | c.782+1G>A | splice_donor_variant |
| P14 | CDH1 | c.1108G>C(p.D370H) | missense_variant |
| P14 | TP53 | c.799C>T(p.R267W) | missense_variant |
| P14 | EXT2 | c.106G>T(p.G36C) | missense_variant |
| P15 | TP53 | c.515T>G(p.V172G) | missense_variant |
| P15 | NTRK3 | c.1379C>G(p.S460C) | missense_variant |
| P15 | GRM3 | c.1891T>G(p.F631V) | missense_variant |
| P15 | PDGFRB | c.3098C>T(p.A1033V) | missense_variant |
| P15 | MYC | . | Amp |
| P17 | TP53 | c.488A>G(p.Y163C) | missense_variant |
| P17 | GNAS | c.1181C>T(p.A394V) | missense_variant |
| P17 | LRP1B | c.3933A>T(p.R1311S) | missense_variant |
| P17 | BAI3 | c.4066A>T(p.M1356L) | missense_variant |
| P17 | POLH | c.230_237dupTGGCACAA(p.V80Wfs*23) | frameshift_variant |
| P17 | FANCI | c.3496A>G(p.T1166A) | missense_variant |
| P18 | PTEN | c.376G>A(p.A126T) | missense_variant |
| P18 | PLK1 | c.1193_1194delAG(p.E398Gfs*3) | splice_acceptor_variant |
| P18 | ARID1A | c.4555C>T(p.Q1519*) | stop_gained |
| P18 | AKT3 | c.992G>T(p.G331V) | missense_variant |
| P18 | NRG1 | c.960A>C(p.K320N) | missense_variant |
| P19 | TP53 | c.97-1G>A | splice_acceptor_variant |
| P19 | NTRK2 | c.1853A>C(p.K618T) | missense_variant |
| P19 | PRSS1 | c.237A>C(p.E79D) | missense_variant |
| P19 | ERBB4 | c.2615A>C(p.E872A) | missense_variant |
| P19 | PTCH1 | c.3320C>T(p.A1107V) | missense_variant |
| P19 | LRP1B | c.6094delG(p.V2032Lfs*4) | frameshift_variant |
| P19 | SETBP1 | c.2398T>A(p.S800T) | missense_variant |
| P19 | IGF1R | c.2467G>A(p.A823T) | missense_variant |
| P19 | CDC73 | c.416G>A(p.R139Q) | missense_variant |
| P19 | PGR | c.1766T>C(p.V589A) | missense_variant |
| P19 | AR | c.1660T>C(p.F554L) | missense_variant |
| P19 | ERBB4 | c.3270A>C(p.E1090D) | missense_variant |
| P19 | EPHA5 | c.727T>C(p.F243L) | missense_variant |
| P19 | SMAD3 | c.1265C>T(p.S422F) | missense_variant |
| P19 | HGF | . | Amp |
| P19 | KRAS | . | Amp |
| P19 | CDK6 | . | Amp |
| P20 | TP53 | c.586C>T(p.R196*) | stop_gained |
| P20 | PRF1 | c.1136G>A(p.R379Q) | missense_variant |
| P20 | GATA3 | c.1038C>A(p.Y346*) | stop_gained |
| P20 | KMT2B | c.890G>A(p.R297Q) | missense_variant |
| P20 | MAP3K1 | c.2090G>A(p.R697H) | missense_variant;splice_region_variant |
| P21 | EGFR | . | Amp |
| P21 | TP53 | c.1045G>T(p.E349*) | stop_gained |
| P21 | ARID1A | c.531_532delAA(p.S178Pfs*221) | frameshift_variant |
| P21 | NTRK2 | c.2221A>C(p.I741L) | missense_variant |
| P21 | GRM3 | c.655G>A(p.E219K) | missense_variant |
| P21 | MYC | . | Amp |
| P22 | APC | c.3808T>C(p.C1270R) | missense_variant |
| P22 | TP53 | c.817C>T(p.R273C) | missense_variant |
| P22 | GNAS | c.1570C>T(p.R524C) | missense_variant |
| P23 | GATA1 | c.774C>A(p.C258*) | stop_gained |
| P23 | PIK3CA | c.1624G>A(p.E542K) | missense_variant |
| P23 | TP53 | c.578A>T(p.H193L) | missense_variant |
| P23 | ATM | c.6068G>A(p.G2023E) | missense_variant |
| P23 | LRP1B | c.10366T>G(p.C3456G) | missense_variant |
| P23 | DLL3 | . | Amp |
| P23 | CCNE1 | . | Amp |
| P23 | AKT2 | . | Amp |
| P24 | CDK12 | . | Amp |
| P24 | ERBB2 | . | Amp |
| P24 | FGFR3 | c.1703G>A(p.R568Q) | missense_variant |
| P24 | FANCA | c.488G>A(p.R163H) | missense_variant |
| P24 | CDK12 | IGR (upstream NEUROD2)~CDK12:exon7 | SV |
| P24 | CCNE1 | . | Amp |
| P24 | VEGFA | . | Amp |
| P25 | TP53 | c.844C>T(p.R282W) | missense_variant |
| P25 | CDK8 | c.1042G>A(p.G348S) | missense_variant |
| P25 | GRM8 | c.151C>A(p.L51I) | missense_variant |
| P25 | CDK6 | . | Amp |
| P25 | KRAS | . | Amp |
| P25 | RICTOR | . | Amp |
| P25 | MCL1 | . | Amp |
| P25 | IL7R | . | Amp |
| P26 | EGFR | . | Amp |
| P26 | FBXW7 | c.1513C>T(p.R505C) | missense_variant |
| P26 | TP53 | c.396G>T(p.K132N) | missense_variant |
| P26 | ATM | c.4010T>C(p.I1337T) | missense_variant |
| P26 | NOTCH2 | REG4:exon6~NOTCH2:exon17 | SV |
| P26 | CCNE1 | . | Amp |
| P27 | ERBB2 | . | Amp |
| P27 | CCNE1 | . | Amp |
| P27 | TP53 | c.817C>T(p.R273C) | missense_variant |
| P27 | AKT1 | c.1366G>A(p.D456N) | missense_variant;splice_region_variant |
| P27 | GRM3 | c.1303T>G(p.L435V) | missense_variant |
| P27 | MED12 | c.5803T>A(p.S1935T) | missense_variant |
| P27 | EXT2 | c.902A>G(p.H301R) | missense_variant |
| P27 | DICER1 | c.2063G>A(p.R688Q) | missense_variant |
| P27 | ATR | c.1363G>A(p.D455N) | missense_variant |
| P27 | LRP1B | c.13226A>G(p.E4409G) | missense_variant |
| P27 | PIK3C3 | c.628C>T(p.R210*) | stop_gained |
| P27 | EPHA5 | c.1723A>T(p.I575F) | missense_variant |
| P27 | NTRK1 | c.149G>A(p.C50Y) | missense_variant |
| P27 | ARAF | c.1571G>A(p.R524H) | missense_variant |
| P28 | TP53 | c.413C>T(p.A138V) | missense_variant |
| P28 | LRP1B | c.12551T>G(p.L4184R) | missense_variant |
| P28 | FLT4 | c.1429C>T(p.R477W) | missense_variant |
| P28 | HNF1A | c.516G>C(p.E172D) | missense_variant |
| P29 | ERBB2 | . | Amp |
| P29 | TOP2A | . | Amp |
| P29 | CDK12 | . | Amp |
| P29 | MYC | . | Amp |
| P29 | TP53 | c.414_415insT(p.K139*) | frameshift_variant |
| P29 | FANCG | c.47G>T(p.W16L) | missense_variant |
| P29 | PDE11A | c.2525G>A(p.G842E) | missense_variant |
| P29 | CHD4 | c.307T>A(p.S103T) | missense_variant |
| P29 | EPHA3 | c.2077A>C(p.K693Q) | missense_variant;splice_region_variant |
| P29 | MYCL | c.783G>T(p.R261S) | missense_variant |
| P29 | ARID1A | c.2571G>T(p.R857S) | missense_variant |
| P29 | SETBP1 | c.2003A>C(p.K668T) | missense_variant |
| P29 | FANCE | c.1441C>A(p.L481M) | missense_variant |
| P29 | PRF1 | c.727G>A(p.E243K) | missense_variant |
| P29 | ATR | c.2320dupA(p.I774Nfs*3) | frameshift_variant |
| P29 | NOTCH1 | c.977delG(p.G326Afs*305) | frameshift_variant |
| P29 | MLH3 | c.4076_4084delCTCTGTCCTinsG(p.A1359Gfs*20) | frameshift_variant |
| P29 | CRKL | . | Amp |
| P30 | ERBB2 | . | Amp |
| P30 | ZNF703 | . | Amp |
| P30 | TP53 | c.524G>A(p.R175H) | missense_variant |
| P30 | FLT4 | c.898G>A(p.V300I) | missense_variant |
| P30 | ZNF217 | c.2828C>A(p.P943H) | missense_variant |
| P30 | NTRK3 | c.1586-1G>T | splice_acceptor_variant |
| P30 | PAX5 | c.61A>G(p.N21D) | missense_variant |
| P30 | ERBB2 | . | large_fragment_deletion |
| P30 | MCL1 | . | Amp |
| P31 | CDK12 | . | Amp |
| P31 | ERBB2 | . | Amp |
| P31 | CDK12 | c.2420-2A>G | splice_acceptor_variant |
| P31 | TP53 | c.538G>T(p.E180*) | stop_gained |
| P31 | GRM3 | c.1835G>A(p.R612Q) | missense_variant |
| P31 | NTRK3 | c.2237A>C(p.K746T) | missense_variant |
| P31 | PREX2 | c.45G>C(p.K15N) | missense_variant |
| P31 | PTPN13 | c.1458A>C(p.E486D) | missense_variant |
| P31 | FBXW7 | c.248G>A(p.R83K) | missense_variant |
| P31 | TEK | c.2516T>C(p.L839P) | missense_variant |
| P31 | PKHD1 | c.7942G>A(p.G2648S) | missense_variant |
| P31 | ABCB1 | c.2744A>T(p.K915M) | missense_variant |
| P31 | LRP1B | c.12653A>C(p.K4218T) | missense_variant |
| P32 | ARID1A | c.5548delG(p.D1850Tfs*33) | frameshift_variant |
| P32 | KRAS | c.35G>A(p.G12D) | missense_variant |
| P32 | XPC | c.2173C>T(p.R725W) | missense_variant |
| P32 | PIK3R2 | c.921delC(p.K308Rfs*33) | frameshift_variant |
| P32 | MAP3K1 | c.746G>A(p.R249H) | missense_variant |
| P32 | GATA2 | c.599delG(p.G200Vfs*18) | frameshift_variant |
| P32 | KMT2B | c.3057delA(p.G1020Afs*4) | frameshift_variant |
| P32 | GATA3 | c.1134delA(p.V379Cfs*26) | frameshift_variant |
| P32 | APC | c.636dupA(p.R213Tfs*39) | frameshift_variant |
| P32 | PIK3CA | c.1637A>G(p.Q546R) | missense_variant |
| P32 | BRCA1 | c.669G>A(p.K223=) | splice_region_variant;synonymous_variant |
| P32 | BARD1 | c.1883G>A(p.C628Y) | missense_variant |
| P32 | KMT2B | c.837delC(p.R280Gfs*25) | frameshift_variant |
| P32 | MSH6 | c.3261dupC(p.F1088Lfs*5) | frameshift_variant |
| P32 | APC | c.2389G>T(p.G797C) | missense_variant |
| P32 | APC | c.4666dupA(p.T1556Nfs*3) | frameshift_variant |
| P32 | CHD8 | c.2359delA(p.R787Gfs*2) | frameshift_variant |
| P32 | HGF | c.1541G>T(p.R514I) | missense_variant;splice_region_variant |
| P32 | MAP2K4 | c.1132G>A(p.A378T) | missense_variant |
| P32 | MAP2K4 | c.219-1G>C | splice_acceptor_variant |
| P32 | MAP2K1 | c.670G>A(p.V224M) | missense_variant |
| P32 | PARP1 | c.1447delG(p.A483Qfs*3) | frameshift_variant |
| P32 | TEK | c.1250delC(p.P417Lfs*10) | frameshift_variant |
| P32 | RNF43 | c.1976delG(p.G659Vfs*41) | frameshift_variant |
| P32 | BAK1 | c.267T>A(p.Y89*) | stop_gained |
| P32 | CDK4 | c.382C>A(p.L128I) | missense_variant |
| P32 | KMT2A | c.3037G>A(p.A1013T) | missense_variant |
| P32 | SOCS1 | c.124T>C(p.C42R) | missense_variant |
| P33 | CCNE1 | . | Amp |
| P33 | TP53 | c.526_528delTGC(p.C176del) | inframe_deletion |
| P33 | FGFR3 | c.1483G>A(p.D495N) | missense_variant |
| P33 | CASP8 | c.1355G>A(p.R452Q) | missense_variant;splice_region_variant |
| P33 | BRCA2 | c.2507C>T(p.P836L) | missense_variant |
| P33 | CTCF | c.464G>T(p.C155F) | missense_variant |
| P33 | GATA6 | c.899_906delTGGCGGCC(p.L300Hfs*160) | frameshift_variant |
| P33 | PREX2 | c.1357T>C(p.F453L) | missense_variant |
| P33 | NRG1 | c.1337C>G(p.T446R) | missense_variant |
| P33 | IGF2 | . | Amp |
| P33 | MYC | . | Amp |
| P33 | ZNF703 | . | Amp |
| P34 | VEGFA | . | Amp |
| P34 | TP53 | c.916C>T(p.R306*) | stop_gained |
| P34 | KRAS | c.38G>A(p.G13D) | missense_variant |
| P34 | APC | c.4393_4394delAG(p.S1465Wfs*3) | frameshift_variant |
| P34 | ATR | c.2320dupA(p.I774Nfs*3) | frameshift_variant |
| P34 | NF2 | c.433G>A(p.A145T) | missense_variant |
| P34 | PREX2 | c.3446G>A(p.R1149H) | missense_variant |
| P34 | ERCC5 | c.3482T>C(p.V1161A) | missense_variant |
| P35 | TP53 | c.721T>C(p.S241P) | missense_variant |
| P35 | JUN | c.742dupG(p.E248Gfs*62) | frameshift_variant |
| P36 | KRAS | . | Amp |
| P36 | TP53 | c.743G>A(p.R248Q) | missense_variant |
| P36 | CHD8 | c.1691G>A(p.R564Q) | missense_variant |
| P36 | GNAS | c.1021G>A(p.G341R) | missense_variant |
| P37 | CCNE1 | . | Amp |
| P37 | ZNF703 | . | Amp |
| P37 | MYC | . | Amp |
| P37 | TERC | . | Amp |
| P37 | POLD1 | c.376C>T(p.R126C) | missense_variant |
| P37 | CBLB | c.1490T>C(p.L497P) | missense_variant |
| P37 | SETBP1 | c.1863G>T(p.K621N) | missense_variant |
| P37 | TP53 | c.814G>A(p.V272M) | missense_variant |
| P37 | ARID1A | c.1203C>A(p.Y401*) | stop_gained |
| P37 | PGR | c.533C>T(p.T178M) | missense_variant |
| P37 | ASCL4 | c.53G>A(p.R18H) | missense_variant |
| P37 | GNAS | c.1396G>A(p.D466N) | missense_variant |
| P37 | ALK | c.2468G>T(p.G823V) | missense_variant |
| P37 | MCL1 | . | Amp |
| P37 | FGFR1 | . | Amp |
| P38 | MDM2 | . | Amp |
| P38 | KRAS | . | Amp |
| P38 | CCNE1 | . | Amp |
| P38 | FAT1 | c.9279_9280dupTC(p.H3094Lfs*23) | frameshift_variant |
| P38 | PIK3C3 | c.307A>T(p.N103Y) | missense_variant |
| P38 | CCNE1 | CCNE1:exon10~IGR (upstream URI1) | SV |
| P38 | SMAD4 | . | Del |
| P39 | ERBB2 | . | Amp |
| P39 | TP53 | c.82_83insT(p.E28Vfs*15) | frameshift_variant |
| P39 | ARID1A | c.6572_6580delGTATCGGCA(p.S2191_G2193del) | inframe_deletion |
| P39 | ERBB2 | c.2797G>C(p.D933H) | missense_variant |
| P40 | EIF1AX | c.425A>G(p.D142G) | missense_variant |
| P40 | TP53 | c.817C>T(p.R273C) | missense_variant |
| P40 | NRG1 | c.1802C>A(p.A601E) | missense_variant |
| P40 | GNAS | c.245A>G(p.N82S) | missense_variant |
| P40 | KDM5A | c.4423C>T(p.P1475S) | missense_variant |
| P40 | MAP2K4 | c.220G>T(p.E74*) | stop_gained;splice_region_variant |
| P40 | PIK3CA | c.1624G>A(p.E542K) | missense_variant |
| P40 | NRG1 | c.645G>T(p.E215D) | missense_variant |
| P40 | EPHA3 | c.1812C>A(p.D604E) | missense_variant |
| P41 | MCL1 | . | Amp |
| P41 | MYCN | . | Amp |
| P41 | TP53 | c.763A>T(p.I255F) | missense_variant |
| P41 | PREX2 | c.4769C>A(p.A1590E) | missense_variant |
| P41 | CDK8 | c.1148A>G(p.N383S) | missense_variant |
| P42 | CCNE1 | . | Amp |
| P42 | TP53 | c.722C>G(p.S241C) | missense_variant |
| P42 | LRP1B | c.1205A>G(p.K402R) | missense_variant |
| P42 | TGFBR2 | c.707A>G(p.N236S) | missense_variant |
| P42 | CCNE1 | c.85A>G(p.R29G) | missense_variant |

**Supplementary Table 3** TP53 mutually exclusive or co-occurred mutated genes in 42-patient cohort.

| Gene1 | Gene2 | p value | Event |
| --- | --- | --- | --- |
| RNF43 | TP53 | 0.00731707 | Mutually_Exclusive |
| BRCA2 | TP53 | 0.02589118 | Mutually_Exclusive |
| KMT2B | TP53 | 0.02589118 | Mutually_Exclusive |
| FGFR3 | TP53 | 0.11080139 | Mutually_Exclusive |
| MCL1 | TP53 | 0.11080139 | Mutually_Exclusive |
| FBXW7 | TP53 | 0.19571161 | Mutually_Exclusive |
| FLT4 | TP53 | 0.19571161 | Mutually_Exclusive |
| PIK3CA | TP53 | 0.19571161 | Mutually_Exclusive |
| KRAS | TP53 | 0.28807008 | Mutually_Exclusive |
| NTRK3 | TP53 | 0.28807008 | Mutually_Exclusive |
| ARID1A | TP53 | 0.33643347 | Mutually_Exclusive |
| APC | TP53 | 0.52473868 | Mutually_Exclusive |
| ATM | TP53 | 0.52473868 | Mutually_Exclusive |
| CCNE1 | TP53 | 0.52473868 | Mutually_Exclusive |
| MAP2K4 | TP53 | 0.52473868 | Mutually_Exclusive |
| NRG1 | TP53 | 0.52473868 | Mutually_Exclusive |
| PGR | TP53 | 0.52473868 | Mutually_Exclusive |
| GRM3 | TP53 | 0.56129724 | Co_Occurence |
| ERBB2 | TP53 | 1 | Mutually_Exclusive |
| GNAS | TP53 | 1 | Co_Occurence |
| PREX2 | TP53 | 1 | Co_Occurence |
| ATR | TP53 | 1 | Mutually_Exclusive |
| SETBP1 | TP53 | 1 | Mutually_Exclusive |
